# Supplementary material for: Stereotypic Immune System Development in Newborn Children
Source: PubMed Central journal article supplement — Cell. 2018 Aug 23;174(5):1277–1292.e14. doi: 10.1016/j.cell.2018.06.045 (PMC6108833; doi:10.1016/j.cell.2018.06.045), 2018-08-23
Supplement: mmc4.pdf [file mmc4.pdf]

**Supplementary Table 4, Related to Figure 1**

| Depth      | Name                                          |
|------------|-----------------------------------------------|
|            | All_cells                                     |
| >          | DNA_pos (DNA Ir191+/193+)                     |
| >>         | Eosinophils (CCR3+ EQBeads-)                  |
| >>         | EQBeads (EQBeads Ce140+)                      |
| >>         | Non_eosinophils (EQBeads- CCR3-)              |
| >>>        | Non T-cells (CD3e-)                           |
| >>>>       | B-cells + Plasmablasts (CD19+)                |
| >>>>>      | IgD+ B-cells (IgD+)                           |
| >>>>>>     | Naive B-cells (CD27+)                         |
| >>>>>>     | Unswitched Memory B-cells (CD27-)             |
| >>>>>      | IgD- B-cells (IgD-)                           |
| >>>>>>     | CD27+ Unswitched Memory B-cells (CD38- CD27+) |
| >>>>>>     | CD27- Unswitched Memory B-cells (CD38- CD27-) |
| >>>>>>     | Plasmablasts (CD38+ CD27+)                    |
| >>>>       | Non T/B-cells (CD19-)                         |
| >>>>>      | NK-cells (CD7+ CD56+)                         |
| >>>>>>     | CD56bright NK-cells (CD56++)                  |
| >>>>>>     | CD56dim NK-cells (CD56-/+)                    |
| >>>>>      | Non T/B/NK-cells (CD7-)                       |
| >>>>>>     | CD123+ cells (CD123+)                         |
| >>>>>>>    | Basophils (HLA-DR+)                           |
| >>>>>>>    | Plasmacytoid Dendritic Cells (HLA-DR-)        |
| >>>>>>     | CD123- cells (CD123-)                         |
| >>>>>>>    | Myeloid CD24+ CD14+ (CD24+ CD14+)             |
| >>>>>>>    | Myeloid non-neutrophils (CD24-)               |
| >>>>>>>>   | CD14+ Monocytes (CD14+)                       |
| >>>>>>>>>  | CD16mid CD14+ Monocytes (CD16+)               |
| >>>>>>>>>  | Classical CD16- Monocytes (CD16-)             |
| >>>>>>>>   | Myeloid CD14- (CD14-)                         |
| >>>>>>>>>  | Myeloid CD14-/HLA-DR+ (HLA-DR+)               |
| >>>>>>>>>> | Endothelial Cells (CD11c- CD38-)              |
| >>>>>>>>>> | Myeloid Dendritic Cells CD11c+ CD38+          |
| >>>>>>>>>> | Nonclassical Monocytes (CD11c+ CD38-)         |
| >>>>>>>    | Neutrophils (CD24+ CD14-)                     |
| >>>        | T_cells (CD3e+)                               |
| >>>>       | Conventional T-cells (CD56-)                  |
| >>>>>      | CD4+ T-cells (CD4+ CD8a-)                     |
| >>>>>>     | Follicular CD4+ T-cells (CXCR5+)              |
| >>>>>>     | non-Follicular CD4+ T-cells (CXCR5-)          |
| >>>>>>>    | CD4+ TEMRA cells (CD45RA+ CD27-)              |
| >>>>>>>    | Central-memory CD4+ T-cells (CD45RA- CD27+)   |
| >>>>>>>    | Effector-memory CD4+ T-cells (CD45RA- CD27-)  |
| >>>>>>>    | Naive CD4+ T-cells (CD45RA+ CD27+)            |
| >>>>>      | CD8+ T-cells (CD4- CD8a+)                     |
| >>>>>>     | CD8+ TEMRA cells (CD45RA+ CD27-)              |
| >>>>>>     | Central-memory CD8+ T-cells (CD45RA- CD27+)   |
| >>>>>>     | Effector-memory CD8+ T-cells (CD45RA- CD27-)  |
| >>>>>>     | Naive CD8+ T-cells (CD45RA+ CD27+)            |
| >>>>>      | Double-Negative T-cells (CD4- CD8a-)          |
| >>>>>      | Double-Positive T-cells (CD4+ CD8a+)          |
| >>>>       | NKT-cells (CD56+)                             |
